# Supplementary material for: Coordination chemistry of tetrazolate-5-carboxylate with manganese(ii): synthesis, structure and magnetism
Source: Royal Society of Chemistry journal article supplement (doi:10.1039/b818915c), 2009-01-01
Supplement: b818915c.pdf [file b818915c.pdf]

## Supporting Information

**Coordination chemistry of tetrazolate-5-carboxylate with  
manganese(II): synthesis, structure and magnetism**

*Qin-Xiang Jia, Wei-Wei Sun, Cheng-Fu Yao, Hai-Hong Wu, En-Qing Gao,\* and Cai-Ming Liu*

**Table S1.** Selected bond lengths and angles for complex **1**.

| D-H...A         | d(D-H)    | d(H...A)  | d(D...A)     | <(DHA) |               |    |             |    |                    |
|-----------------|-----------|-----------|--------------|--------|---------------|----|-------------|----|--------------------|
| O3-H3WB...O2#1  | 0.78(3)   | 1.98(3)   | 2.751(2)     | 169(2) |               |    |             |    |                    |
| O3-H3WA...N4#2  | 0.79(3)   | 2.02(3)   | 2.811(2)     | 177(2) |               |    |             |    |                    |
| O4-H4WB...O2#3  | 0.88(3)   | 1.91(3)   | 2.773(2)     | 166(3) |               |    |             |    |                    |
| O4-H4WA...O6#4  | 0.77(3)   | 1.91(3)   | 2.682(2)     | 173(3) |               |    |             |    |                    |
| O5-H5WB...O7    | 0.836(15) | 1.905(17) | 2.734(2)     | 171(2) |               |    |             |    |                    |
| O5-H5WA...O6    | 0.804(16) | 1.980(17) | 2.777(2)     | 171(2) |               |    |             |    |                    |
| O7-H7W...O2#1   | 0.821(17) | 2.43(2)   | 3.0465(14)   | 132(3) |               |    |             |    |                    |
| O6-H6WA...O8#3  | 0.863(15) | 1.879(17) | 2.718(2)     | 164(2) |               |    |             |    |                    |
| O6-H6WB...N3#5  | 0.809(16) | 2.097(19) | 2.851(2)     | 155(3) |               |    |             |    |                    |
| O8-H8W...O1#4   | 0.77(2)   | 2.00(2)   | 2.7578(17)   | 168(3) |               |    |             |    |                    |
| Symmetry codes: |           |           |              |        |               |    |             |    |                    |
| #1              | x+1, y, z | #2        | -x,-y+1,-z+1 | #3     | x+1/2,y+1/2,z | #4 | -x,y,-z+1/2 | #5 | x+1/2,-y+3/2,z-1/2 |

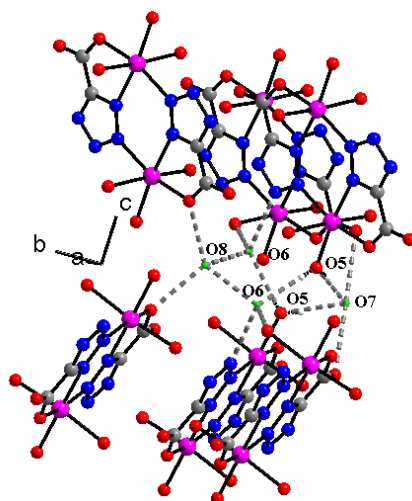

**Figure S1.** The interlayer hydrogen bonds through free water molecules in **1**.

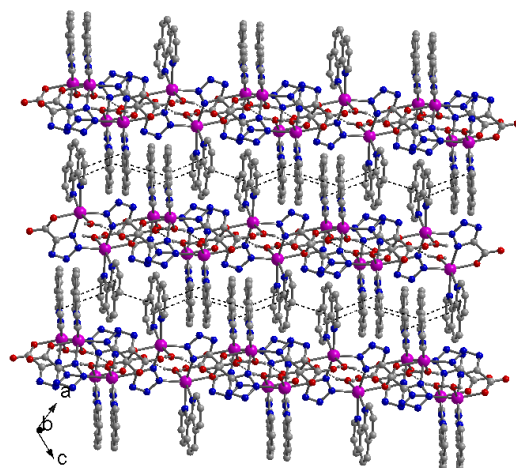

**Figure S2.** The 3D supramolecular structure assembled via hydrogen bond and  $\pi$ - $\pi$  interactions of **3**.

**Table S2.** Hydrogen bonds parameters for complex **2**.

| D-H...A        | d(D-H)    | d(H...A) | d(D...A)  | <(DHA) |
|----------------|-----------|----------|-----------|--------|
| O3-H3B...O4#1  | 0.825(19) | 2.00(2)  | 2.816(5)  | 168(4) |
| O3-H3A...N3#2  | 0.849(19) | 1.93(2)  | 2.778(16) | 173(4) |
| O3-H3A...O2'#2 | 0.849(19) | 2.02(3)  | 2.838(18) | 162(5) |
| O4-H4B...N2#3  | 0.829(19) | 1.81(2)  | 2.619(8)  | 166(5) |
| O4-H4B...O1'#3 | 0.829(19) | 2.12(2)  | 2.945(10) | 171(5) |
| O4-H4A...N4#4  | 0.849(19) | 1.82(3)  | 2.634(6)  | 161(5) |
| O4-H4A...O2'#4 | 0.849(19) | 2.14(3)  | 2.954(11) | 160(6) |

Symmetry codes: #1  $x-1,y,z$     #2  $x,-y+1/2,z+1/2$     #3  $-x+1,-y,-z$   
#4  $-x+1,-y+1,-z$

**Table S3.** Hydrogen bonds parameters for complex **6**.

| D-H...A         | d(D-H)  | d(H...A) | d(D...A)  | <(DHA) |
|-----------------|---------|----------|-----------|--------|
| O4-H4W2...N4#1  | 0.85(2) | 1.88(3)  | 2.712(7)  | 168(6) |
| O4-H4W2...O2'#1 | 0.85(2) | 2.23(3)  | 3.06(3)   | 165(5) |
| O4-H4W2...N4'#1 | 0.85(2) | 2.51(5)  | 3.046(13) | 122(5) |
| O4-H4W1...N2#2  | 0.85(2) | 1.96(2)  | 2.809(9)  | 176(8) |
| O4-H4W1...O1'#2 | 0.85(2) | 2.23(4)  | 3.054(19) | 163(7) |
| O3-H3W2...N5#3  | 0.95(6) | 1.81(6)  | 2.757(6)  | 173(5) |
| O3-H3W1...N3#3  | 0.81(6) | 2.09(7)  | 2.868(17) | 163(6) |
| O3-H3W1...O2'#3 | 0.81(6) | 2.16(7)  | 2.96(3)   | 174(7) |

---

Symmetry codes: #1.  $-x+1/2, -y+3/2, -z+1$  #2.  $-x+1/2, -y+1/2, -z+1$

#3.  $x, -y+1, z+1/2$

---

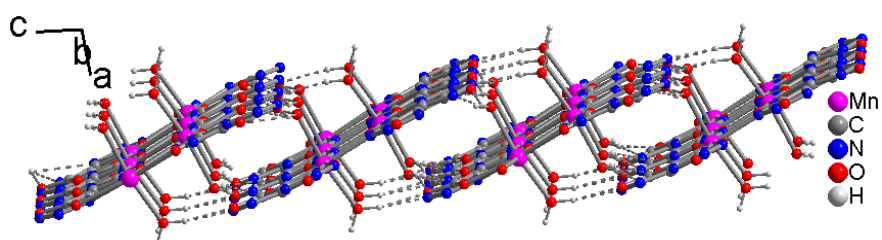

**Figure S3.** The 2D supramolecular layer assembled via hydrogen bonds in **2**.

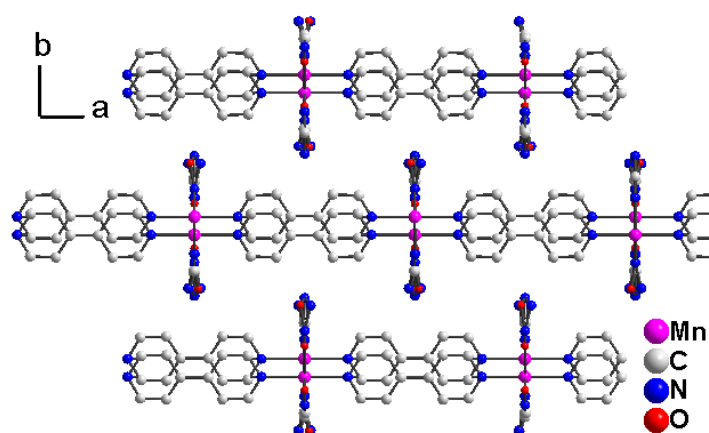

**Figure S4.** The packed view of extended 2D layers along the *ac* plane of **5**.

**Table S4.** Selected bond lengths and angles of **4**.

|           |            |           |           |
|-----------|------------|-----------|-----------|
| Mn1-O4    | 2.134(2)   | Mn1-N4    | 2.240(2)  |
| Mn1-O3    | 2.167(2)   | Mn1-N5    | 2.259(2)  |
| Mn1-O2    | 2.2372(19) | Mn1-N6    | 2.265(2)  |
| O4-Mn1-O3 | 82.80(10)  | O2-Mn1-N5 | 89.32(8)  |
| O4-Mn1-O2 | 94.93(8)   | N4-Mn1-N5 | 100.82(9) |

|           |           |           |           |
|-----------|-----------|-----------|-----------|
| O3-Mn1-O2 | 104.74(8) | O4-Mn1-N6 | 98.53(10) |
| O4-Mn1-N4 | 163.22(9) | O3-Mn1-N6 | 95.16(9)  |
| O3-Mn1-N4 | 87.74(8)  | O2-Mn1-N6 | 157.21(8) |
| O2-Mn1-N4 | 74.08(7)  | N4-Mn1-N6 | 96.09(8)  |
| O4-Mn1-N5 | 91.51(10) | N5-Mn1-N6 | 72.09(9)  |
| O3-Mn1-N5 | 165.19(9) |           |           |

**Table S5.** Hydrogen bonds parameters for complex **4**.

| D-H...A        | d(D-H)    | d(H...A)  | d(D...A) | <(DHA) |
|----------------|-----------|-----------|----------|--------|
| O3-H3W2...O2#1 | 0.843(17) | 1.920(18) | 2.755(3) | 170(3) |
| O4-H4W1...O1#1 | 0.842(17) | 1.897(17) | 2.729(3) | 169(3) |
| O3-H3W1...N2#2 | 0.848(17) | 1.904(18) | 2.750(3) | 176(3) |
| O4-H4W2...N3#3 | 0.814(17) | 1.959(17) | 2.772(3) | 176(3) |

Symmetry codes: #1  $-x+1/2, y+1/2, -z+1/2$  #2  $-x+1, -y+1, -z+1$  #3  $x-1/2, -y+1/2, z-1/2$

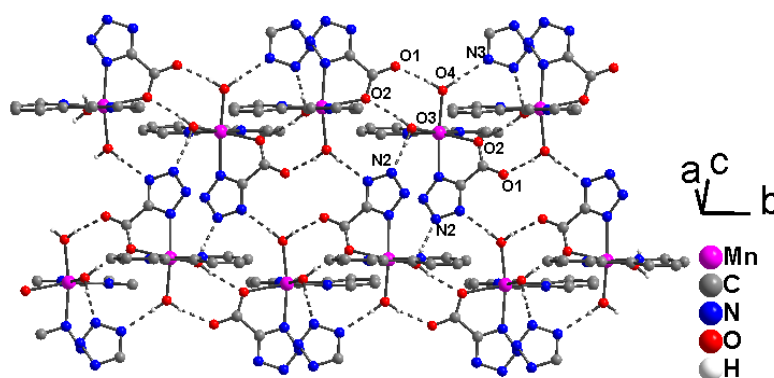**Figure S5.** The 2D hydrogen bonding layer in **4**.
